# Supplementary material for: Blood-based tumor mutational burden as a biomarker for atezolizumab in non-small cell lung cancer: the phase 2 B-F1RST trial
Source: PubMed Central journal article supplement (PMC9117143; doi:10.1038/s41591-022-01754-x), 2022-04-14
Supplement: 41591_2022_1754_MOESM1_ESM.pdf [file 41591_2022_1754_MOESM1_ESM.pdf]

---

**Supplementary information**

---

**Blood-based tumor mutational burden as a biomarker for atezolizumab in non-small cell lung cancer: the phase 2 B-F1RST trial**

---

In the format provided by the authors and unedited

## Online supplement

### ***Supplementary Tables***

Table S1. Patient demographics and characteristics

Table S2. Unadjusted and adjusted baseline characteristics between MSAF<1% and MSAF≥1% groups

Table S3. Safety summary

Table S4. AEs of special interest

**Table S1. Patient demographics and characteristics**

| Characteristic                            | ITT<br>(N = 152) | MSAF ≥ 1%<br>(n = 119) | MSAF ≥ 1%             |                               |
|-------------------------------------------|------------------|------------------------|-----------------------|-------------------------------|
|                                           |                  |                        | bTMB < 16<br>(n = 91) | bTMB ≥ 16<br>(n = 28)         |
| Age, median (range), y                    | 69 (39-90)       | 70 (47-90)             | 70 (47-90)            | 70 (52-89)                    |
| Age group, n (%)                          |                  |                        |                       |                               |
| < 65 y                                    | 51 (34)          | 35 (29)                | 25 (27)               | 10 (36)                       |
| ≥ 65 y                                    | 101 (66)         | 84 (71)                | 66 (73)               | 18 (64)                       |
| Sex, n (%)                                |                  |                        |                       |                               |
| Male                                      | 83 (55)          | 66 (55)                | 47 (52)               | 19 (68)                       |
| Female                                    | 69 (45)          | 53 (45)                | 44 (48)               | 9 (32)                        |
| Race, n (%)                               |                  |                        |                       |                               |
| American Indian/Alaska Native             | 1 (0.7)          | 1 (0.8)                | 1 (1)                 | 0                             |
| Asian                                     | 1 (0.7)          | 0                      | 0                     | 0                             |
| Black                                     | 13 (9)           | 9 (8)                  | 8 (9)                 | 1 (4)                         |
| White                                     | 135 (89)         | 107 (90)               | 80 (88)               | 27 (96)                       |
| Unknown                                   | 2 (1)            | 2 (2)                  | 2 (2)                 | 0                             |
| Smoking status, n (%)                     |                  |                        |                       |                               |
| Never                                     | 11 (7)           | 6 (5)                  | 6 (7)                 | 0                             |
| Current/previous                          | 141 (93)         | 113 (95)               | 85 (93)               | 28 (100)                      |
| ECOG PS, n (%)                            |                  |                        |                       |                               |
| 0                                         | 40 (26)          | 29 (24)                | 21 (23)               | 8 (29)                        |
| 1                                         | 112 (74)         | 90 (76)                | 70 (77)               | 20 (71)                       |
| Study entry staging, n (%)                |                  |                        |                       |                               |
| IIIB                                      | 11 (7)           | 9 (8)                  | 9 (10)                | 0                             |
| IVA                                       | 68 (45)          | 52 (44)                | 40 (44)               | 12 (43)                       |
| IVB                                       | 73 (48)          | 58 (49)                | 42 (46)               | 16 (57)                       |
| Histology, n (%)                          |                  |                        |                       |                               |
| Non-squamous                              | 110 (72)         | 84 (71)                | 69 (76)               | 15 (54)                       |
| Squamous                                  | 42 (28)          | 35 (29)                | 22 (24)               | 13 (46)                       |
| PD-L1 IHC, n (%) <sup>a</sup>             |                  |                        |                       |                               |
| Negative                                  | 37 (24)          | 33 (28)                | 22 (24)               | 11 (39)                       |
| Positive                                  | 61 (40)          | 45 (38)                | 36 (40)               | 9 (32)                        |
| Missing                                   | 54 (36)          | 41 (34)                | 33 (36)               | 8 (29)                        |
| MSAF, median (range), %                   | N/A              | 4.0 (1.0, 19.4)        | 3.3 (1.0, 19.4)       | 10.7 (1.9, 19.4) <sup>a</sup> |
| SLD, median (range), mm                   | 63 (13-257)      | 70 (13-257)            | 66 (13-212)           | 105 (13-257)                  |
| Prior radiation therapy, n (%)            | 60 (39)          | 43 (36)                | 34 (37)               | 9 (32)                        |
| Prior neoadjuvant/adjuvant therapy, n (%) | 8 (5)            | 6 (5)                  | 5 (5)                 | 1 (4)                         |

Data cut: July 26, 2019. bTMB, blood-based tumor mutational burden; ECOG PS, Eastern Cooperative Oncology Group performance status; IHC, immunohistochemistry; ITT, intention to treat; MSAF, maximum somatic allele frequency; N/A, not available; PD-L1, programmed death-ligand 1; SLD, sum of the longest diameters. <sup>a</sup>  $P < 0.001$  for bTMB $\geq$ 16 vs <16.

**Table S2 Unadjusted and adjusted baseline characteristics between MSAF<1% and MSAF≥1% groups**

| Characteristic                               | Unadjusted        |                   |         | Adjusted          |                   |         |
|----------------------------------------------|-------------------|-------------------|---------|-------------------|-------------------|---------|
|                                              | MSAF < 1%         | MSAF ≥ 1%         | P value | MSAF < 1%         | MSAF ≥ 1%         | P value |
| No. of patients, n                           | 29                | 119               |         | 28                | 119               |         |
| Age, median (range), years                   | 65 (39-84)        | 70 (47-90)        | 0.03    | 66 (39-84)        | 69 (47-90)        | 0.53    |
| Age group, n (%)                             |                   |                   |         |                   |                   |         |
| < 65 years                                   | 14 (48)           | 35 (29)           | 0.086   | 8 (30)            | 39 (33)           | 0.80    |
| ≥ 65 years                                   | 15 (52)           | 84 (71)           |         | 19 (70)           | 80 (67)           |         |
| Sex, n (%)                                   |                   |                   |         |                   |                   |         |
| Female                                       | 14 (48)           | 53 (45)           | 0.88    | 12 (44)           | 53 (45)           | 0.96    |
| Male                                         | 15 (52)           | 66 (55)           |         | 15 (56)           | 66 (55)           |         |
| Tobacco history, n (%)                       |                   |                   |         |                   |                   |         |
| Never                                        | 4 (14)            | 6 (5)             | 0.14    | 2 (7)             | 8 (7)             | 0.52    |
| Current                                      | 4 (14)            | 30 (25)           |         | 4 (13)            | 27 (23)           |         |
| Previous                                     | 21 (72)           | 83 (70)           |         | 22 (80)           | 84 (71)           |         |
| Pathology/histology per eCRF, n (%)          |                   |                   |         |                   |                   |         |
| Non-squamous                                 | 23 (79)           | 84 (71)           | 0.48    | 19 (68)           | 86 (72)           | 0.75    |
| Squamous                                     | 6 (21)            | 35 (29)           |         | 9 (32)            | 33 (28)           |         |
| Study entry staging, n (%)                   |                   |                   |         |                   |                   |         |
| IIIB                                         | 1 (3)             | 9 (8)             | 0.71    | 1 (2)             | 9 (7)             | 0.45    |
| IVA                                          | 14 (48)           | 52 (44)           |         | 11 (39)           | 53 (44)           |         |
| IVB                                          | 14 (48)           | 58 (49)           |         | 16 (59)           | 58 (48)           |         |
| ECOG PS score, n (%)                         |                   |                   |         |                   |                   |         |
| 0                                            | 9 (31)            | 29 (24)           | 0.62    | 8 (28)            | 30 (25)           | 0.76    |
| 1                                            | 20 (69)           | 90 (76)           |         | 20 (72)           | 89 (75)           |         |
| PD-L1 IHC result, n (%)                      |                   |                   |         |                   |                   |         |
| Negative                                     | 3 (10)            | 33 (28)           | 0.13    | 4 (15)            | 29 (24)           | 0.65    |
| Positive                                     | 15 (52)           | 45 (38)           |         | 14 (49)           | 49 (41)           |         |
| Missing                                      | 11 (38)           | 41 (34)           |         | 10 (36)           | 42 (35)           |         |
| No. of target lesions, mean (SD)             | 1.8 (0.9)         | 2.4 (1.2)         | 0.02    | 2.3 (1.1)         | 2.3 (1.2)         | 1.00    |
| Sum of longest diameters, median (range), mm | 42.4 (13.0-200.0) | 70.0 (12.7-257.0) | 0.001   | 48.2 (13.0-200.0) | 64.8 (12.7-257.0) | 0.77    |

Data cut: July 26, 2019. T-tests (for continuous variables) and chi-square tests (for categorical variables) were unadjusted for multiple comparisons and at the 0.15 two-sided significance level. ECOG, Eastern Cooperative Oncology Group performance status; eCRF, electronic case report form; IHC, immunohistochemistry; ITT, intention to treat; MSAF, maximum somatic allele frequency; PD-L1, programmed death-ligand 1.

**Table S3. Safety summary (N = 152)**

| Patients in ITT                          | n (%)               |
|------------------------------------------|---------------------|
| All-Grade AEs, any cause                 | 152 (100)           |
| Treatment-related AEs                    | 116 (76)            |
| All-Grade SAEs, any cause                | 81 (53)             |
| Treatment-related SAEs                   | 22 (14)             |
| Grade 3-4 AEs, any cause                 | 86 (57)             |
| Treatment-related Grade 3-4 AEs          | 30 (20)             |
| Grade 5 AEs, any cause                   | 10 (7) <sup>a</sup> |
| Treatment-related Grade 5 AEs            | 1(1)                |
| AEs leading to treatment discontinuation | 27 (18)             |
| AEs of special interest (immune related) | 66 (43)             |

Data cut: July 26, 2019. AE, adverse event; ITT, intention to treat, SAE, serious adverse event. <sup>a</sup> Grade 5 events reported as respiratory failure (n = 2, 1 treatment related) and death, cardiac arrest, pulmonary embolism, acute respiratory failure, dyspnea, pneumonia, sepsis, malignant pleural effusion (n = 1 each).

**Table S4. AEs of special interest (N = 152)**

| <b>AEs of special interest per MedDRA PT, n (%)</b> | <b>Overall</b> | <b>Grade 3-4<sup>a</sup></b> |
|-----------------------------------------------------|----------------|------------------------------|
| Skin and subcutaneous <sup>b</sup>                  | 30 (20)        | 1 (0.7)                      |
| AST elevation                                       | 13 (9)         | 1 (0.7)                      |
| Hypothyroidism <sup>c</sup>                         | 13 (9)         | 0                            |
| Pneumonitis                                         | 12 (8)         | 6 (4)                        |
| ALT elevation                                       | 11 (7)         | 1 (0.7)                      |
| Colitis                                             | 5 (3)          | 2 (1)                        |
| Hyperthyroidism <sup>c</sup>                        | 2 (1)          | 0                            |
| Adrenal insufficiency                               | 1 (0.7)        | 1 (0.7)                      |
| Keratitis                                           | 1 (0.7)        | 0                            |
| Myocarditis                                         | 1 (0.7)        | 0                            |

Data cut: July 26, 2019. AE, adverse event; ALT, alanine aminotransferase; MedDRA, Medical Dictionary for Regulatory Activities; PT, preferred term; TSH, thyroid-stimulating hormone. <sup>a</sup> All Grade 3 events except for colitis (Grade 4). <sup>b</sup> Includes PTs of maculopapular rash, erythema, dermatitis allergic, rash, rash pruritic, skin ulcer, dermatitis, dermatitis acneiform. <sup>c</sup> Does not include PTs such as thyroxine free decreased, tri-iodothyronine free decreased, blood TSH decreased.
